# Supplementary material
Source: PubMed Central journal article supplement (PMC8197028)
Supplement: NIHMS1705730-supplement-supporting_info.pdf [file NIHMS1705730-supplement-supporting_info.pdf]

Supporting material for:

Quantitative Analysis of Protein Unfolded State Energetics: Experimental and Computational Studies Demonstrate That Non-Native Side-Chain Interactions Stabilize Local Native Backbone Structure.

Junjie Zou<sup>1,2</sup>, Shifeng Xiao<sup>3</sup>, Carlos Simmerling<sup>1,2,\*</sup>, Daniel P. Raleigh<sup>1,2,\*</sup>

<sup>1</sup>Department of Chemistry, Stony Brook University, Stony Brook, New York 11794-3400, United States

<sup>2</sup>Laufer Center for Physical and Quantitative Biology, Stony Brook University, Stony Brook, New York 11794-3400, United States

<sup>3</sup>Shenzhen Key Laboratory of Marine Biotechnology and Ecology, College of Life Sciences and Oceanography, Shenzhen University, Shenzhen 518060, China

\* Authors to whom correspondence should be addressed:

DPR email: [daniel.raleigh@stonybrook.edu](mailto:daniel.raleigh@stonybrook.edu) phone: (631) 632-9547;

CS email: [carlos.simmerling@stonybrook.edu](mailto:carlos.simmerling@stonybrook.edu), phone: (631) 632-5424.

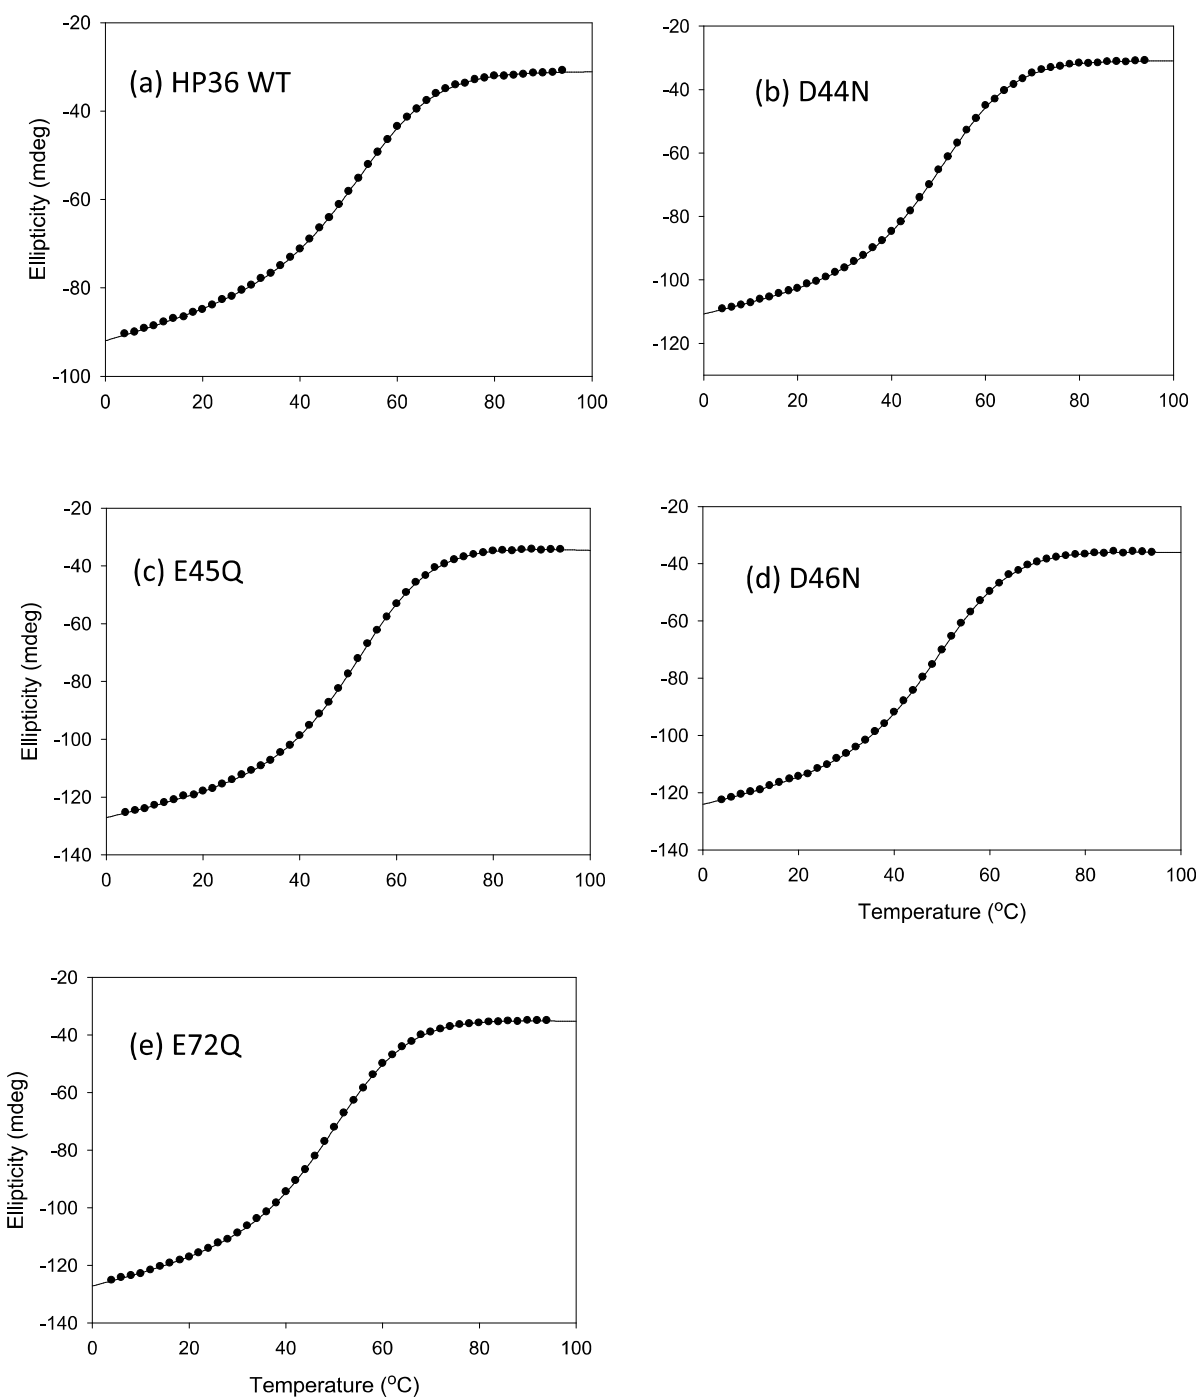

**Figure S1.** Temperature induced unfolding transitions of HP36 wildtype and mutants. (a)HP36 WT, (b)D44N, (c)E45Q, (d)D46N, (e)E72Q. The solid line represents the best fit to a two-state folding transition. Signals were recorded at 222 nm. All spectra were collected in 10 mM sodium acetate, 150 mM sodium chloride, pH 3.0 using a 1.0 cm cuvette.

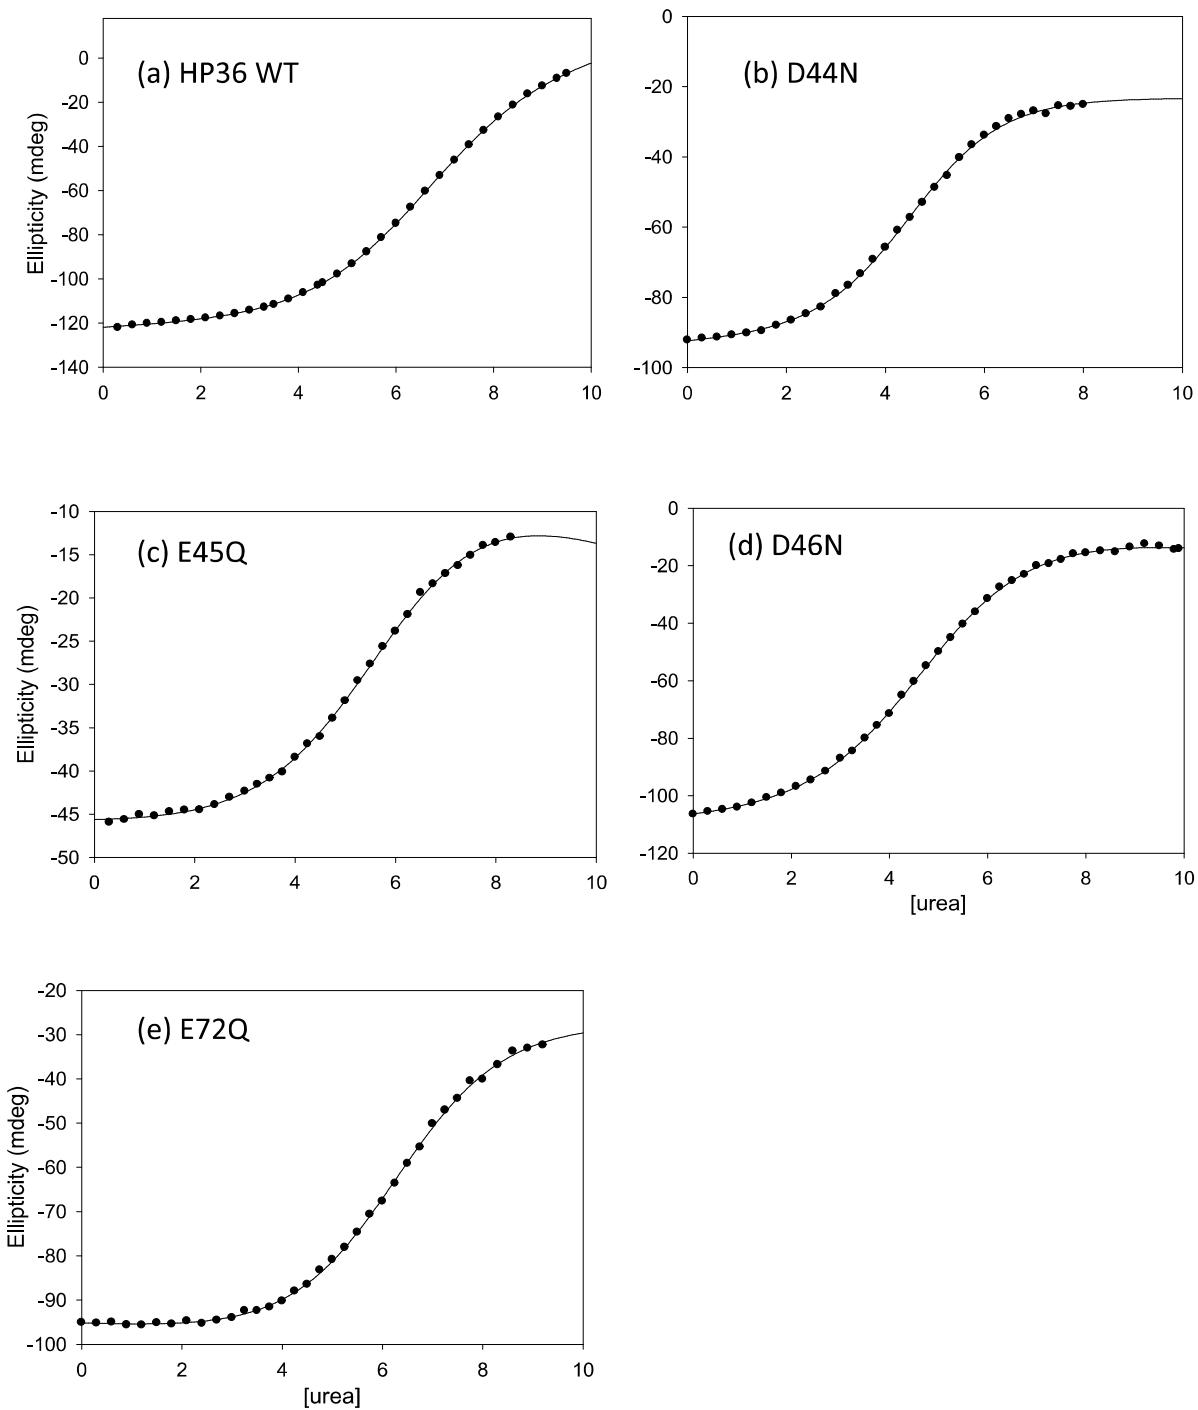

**Figure S2.** Urea induced unfolding transitions of HP36 wildtype and the mutants. (a)HP36 WT, (b)D44N, (c)E45Q, (d)D46N, (e)E72Q. The solid line represents the best fit to a two-state folding transition. Signals were recorded at 222 nm. All spectra were collected at 25 °C in 10 mM sodium acetate, 150 mM sodium chloride, pH 6.0 using a 1.0 cm cuvette.

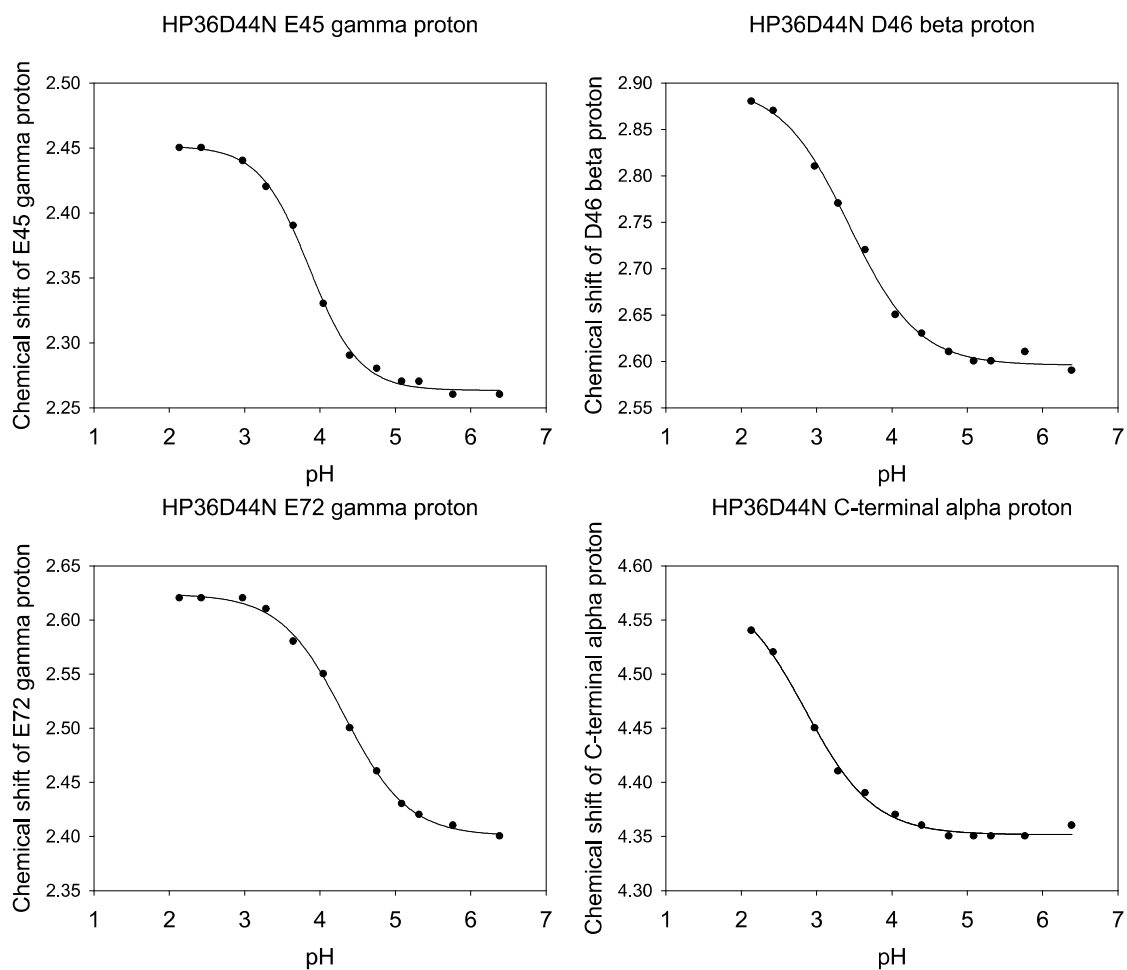

**Figure S3.** pKa determinations via a chemical shift monitored pH titration of native state of HP36D44N. The chemical shifts of  $\gamma$ -H,  $\beta$ -H and  $\alpha$ -H protons were monitored for Glu, Asp and C-terminus respectively.

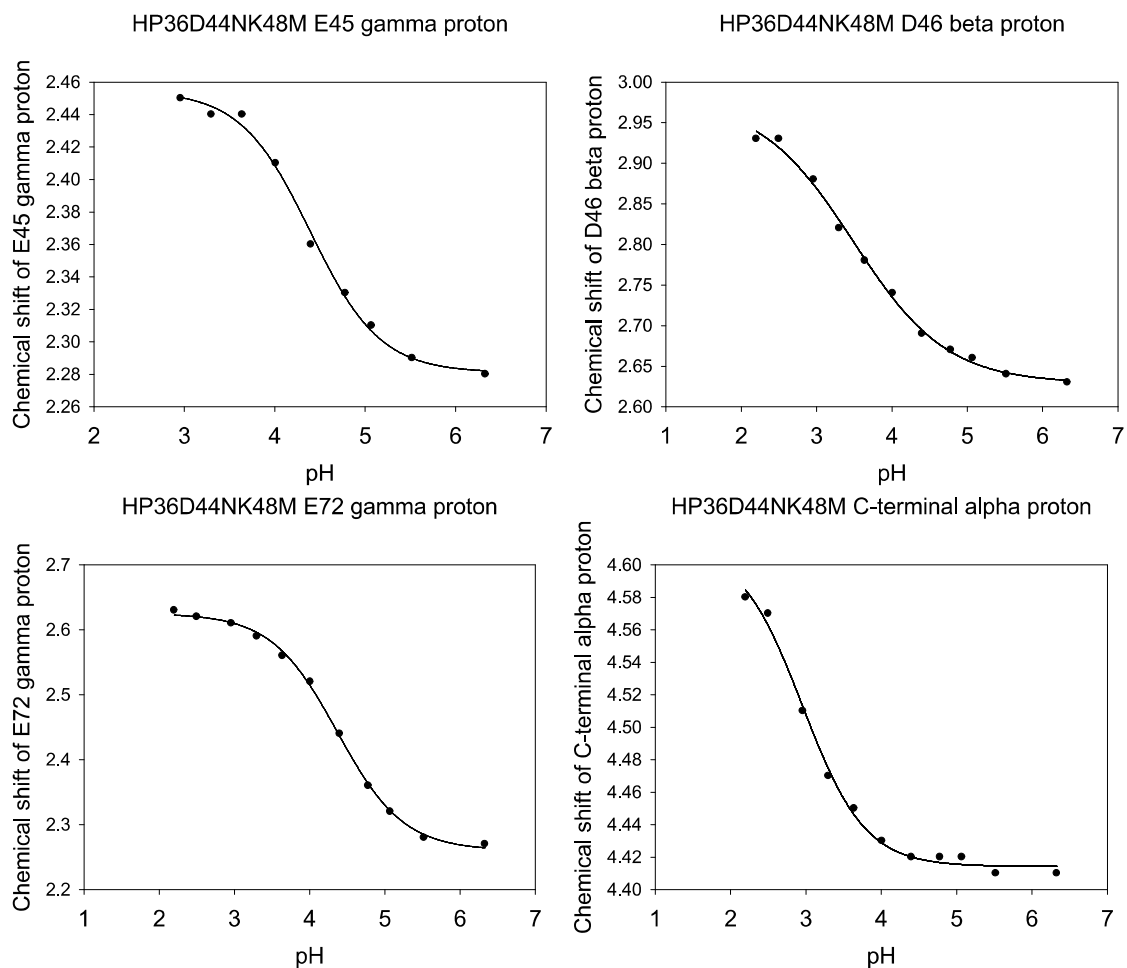

**Figure S4.** pKa determinations via a chemical shift monitored pH titration of native state of v. The chemical shifts of  $\gamma$ -H,  $\beta$ -H and  $\alpha$ -H protons were monitored for Glu, Asp and C-terminus respectively.

**Table S1.** PDB atom name and atom type for an artificial Lys with dummy atoms mimicking Met using in the TI calculations

| Amber PDB atom name for Lys with dummy atoms | Amber ff14sb atom type |                                      |
|----------------------------------------------|------------------------|--------------------------------------|
| N                                            | N                      |                                      |
| H                                            | H                      |                                      |
| CA                                           | CX                     |                                      |
| HA                                           | H1                     |                                      |
| CB                                           | 2C                     | Same element but different atom type |
| HB2, HB3                                     | HC                     |                                      |
| CG                                           | 2C                     | Same element but different atom type |
| HG2, HG3                                     | HC                     |                                      |
| CD                                           | S                      | Corresponds to SD of Met             |
| HD2, HD3                                     | DH                     | Dummy hydrogen                       |
| CE                                           | CT                     | Same element but different atom type |
| HE2, HE3                                     | H1                     | Same element but different atom type |
| NZ                                           | H1                     | Corresponds to HE1 of Met            |
| HZ1, HZ2, HZ3                                | DH                     | Dummy hydrogen                       |
| C                                            | C                      |                                      |
| O                                            | O                      |                                      |

**Table S2.** PDB atom name and atom type for an artificial Asn with dummy atoms mimicking Asp using in the TI calculations

| Amber PDB atom name for Lys with dummy atoms | Amber ff14sb atom type |                                      |
|----------------------------------------------|------------------------|--------------------------------------|
| N                                            | N                      |                                      |
| H                                            | H                      |                                      |
| CA                                           | CX                     |                                      |
| HA                                           | H1                     |                                      |
| CB                                           | 2C                     | Same element but different atom type |
| HB2, HB3                                     | HC                     |                                      |
| CG                                           | CO                     | Same element but different atom type |
| OD1                                          | O2                     | Same element but different atom type |
| ND2                                          | O2                     | Corresponds to OD2 in Asp            |
| HD21, HD22                                   | DH                     | Dummy hydrogen                       |
| C                                            | C                      |                                      |
| O                                            | O                      |                                      |
